# Supplementary material for: Generation of a Dual-Target, Safe, Inexpensive Microbicide that Protects Against HIV-1 and HSV-2 Disease
Source: PubMed Central journal article supplement (PMC5809452; doi:10.1038/s41598-018-21134-1), 2018-02-12
Supplement: 41598_2018_21134_MOESM1_ESM.pdf [file 41598_2018_21134_MOESM1_ESM.pdf]

Generation of a Dual-Target, Safe, Inexpensive Microbicide that Protects Against HIV-1 and HSV-2 Disease

Christina Farr Zuend, John F. Nomellini, John Smit, and Marc S. Horwitz

Supplementary Information

a

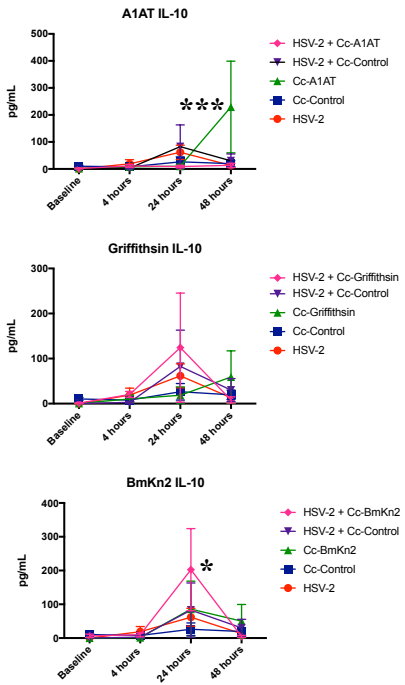

b

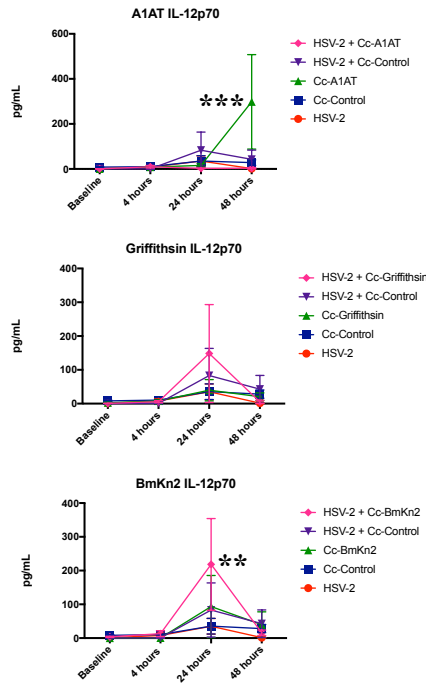

c

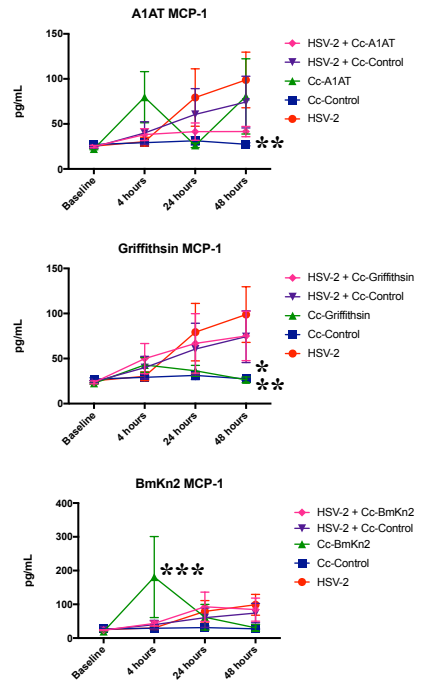

**Supplementary Figure 1:** Progesterone treated C57Bl/6 mice were infected intravaginally with  $10^5$  pfu HSV-2 strain 333 in the presence or absence of individual recombinant *C. crescentus* Cc-Control, Cc-BmKn2, Cc-Griffithsin or Cc-A1AT. Vaginal lavage fluid was collected prior to infection then 4, 24 and 48 hours post-infection and analyzed in a cytometric bead array for mouse inflammatory cytokines. **A)** IL-10 **B)** IL-12p70 **C)** MCP-1. N=4-11 mice per group. For each cytokine statistics were performed using two-way ANOVA with Bonferroni's correction for multiple comparisons. Presented statistics represent the comparison between HSV-2 and each experimental group. All other statistical comparisons were not significant. \* $p < 0.05$ , \*\*  $p < 0.01$ , \*\*\*  $p < 0.001$ .
